# Supplementary material
Source: PubMed Central journal article supplement (PMC7227420)
Supplement: Supp_Figure2.pdf [file Supp_Figure2.pdf]

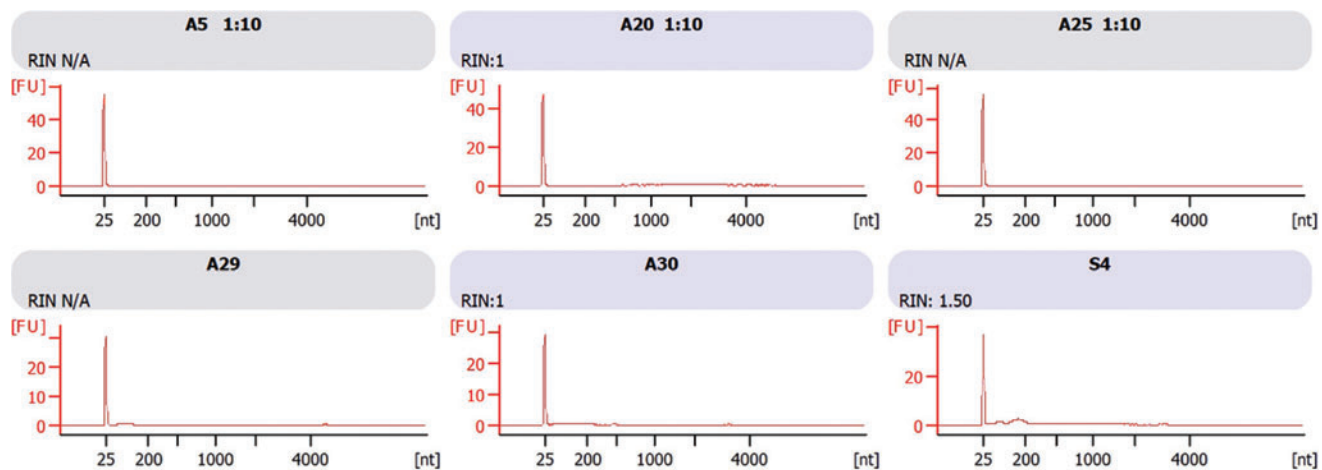

Quality analysis of cerebrospinal fluid RNA. Examination of extracted RNA using an Agilent Bioanalyzer RNA Nanochip demonstrated low RNA yields in cerebrospinal fluid samples, but consistent peaks at 18-25 nucleotides (consistent with successful miRNA extraction).

**SUPPLEMENTARY FIG. S2.** Quality analysis of cerebrospinal fluid ribonucleic acid (RNA). Examination of extracted RNA using an Agilent Bioanalyzer RNA Nanochip demonstrated low RNA yields in cerebrospinal fluid samples but consistent peaks at 18-25 nucleotides (consistent with successful microRNA extraction).
